# Supplementary material
Source: PubMed Central journal article supplement (PMC6510259)

## SUPPLEMENTARY INFORMATION

**Supplementary Figure 1.** Molecular weight of differentially crosslinked proteins. HSA was crosslinked with EDC, glutaraldehyde or DMP and 10 $\mu$ g of protein was loaded into 12% SDS PAGE gel and then stained with Simply Blue Stain Buffer (Life Technologies).

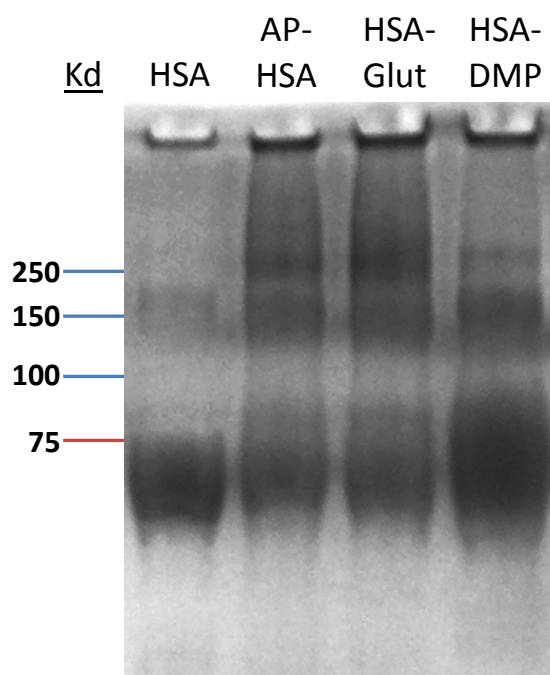

Supplement: NIHMS717004-supplement-Supplementary_File.pdf [file NIHMS717004-supplement-Supplementary_File.pdf]
